# Supplementary material for: An exploratory study of the effect of age and gender on face scanning during affect recognition in immersive virtual reality
Source: PubMed Central journal article supplement (PMC10918108; doi:10.1038/s41598-024-55774-3), 2024-03-06
Supplement: 41598_2024_55774_MOESM1_ESM.pdf [file 41598_2024_55774_MOESM1_ESM.pdf]

# Effect of age and gender on face scanning during affect recognition in immersive virtual reality

## Supplementary Material A. Summaries of viewing time results by emotion and age

**Table A.1.** Summary of the viewing time results by emotion in young adults.

| <b>NEUTRAL</b>           | <b>Hits</b>                                                                                                                                                                                                                                                                                                                                                                                  | <b>Misses</b>                                                                                                                                                                                                                    |
|--------------------------|----------------------------------------------------------------------------------------------------------------------------------------------------------------------------------------------------------------------------------------------------------------------------------------------------------------------------------------------------------------------------------------------|----------------------------------------------------------------------------------------------------------------------------------------------------------------------------------------------------------------------------------|
| Most viewed AOIs         | EY (30.98%), FH (20.04%)<br>MT (18.12%)                                                                                                                                                                                                                                                                                                                                                      | EY (39.09%), MT (27.17%)                                                                                                                                                                                                         |
| Statistical significance | Yes ( $\chi^2(5) = 45.885, p < 0.001$ ) for<br><ul style="list-style-type: none"> <li>• EY &gt; FH (<math>p = 0.002</math>), EY &gt; CH (<math>p = 0.002</math>),<br/>EY &gt; MT (<math>p = 0.013</math>), EY &gt; BG (<math>p &lt; 0.001</math>)</li> <li>• BG &lt; NS (<math>p = 0.001</math>), BG &lt; MT (<math>p = 0.022</math>)</li> </ul>                                             | No ( $\chi^2(5) = 7.581, p = 0.181$ )                                                                                                                                                                                            |
| <b>SURPRISE</b>          | <b>Hits</b>                                                                                                                                                                                                                                                                                                                                                                                  | <b>Misses</b>                                                                                                                                                                                                                    |
| Most viewed AOIs         | EY (31.90%)<br>FH (19.09%)                                                                                                                                                                                                                                                                                                                                                                   | EY (30.67%), FH (24.94%)                                                                                                                                                                                                         |
| Statistical significance | Yes ( $\chi^2(5) = 50.501, p < 0.001$ ) for<br><ul style="list-style-type: none"> <li>• EY &gt; FH (<math>p = 0.006</math>), EY &gt; CH (<math>p = 0.003</math>),<br/>EY &gt; MT (<math>p = 0.028</math>), EY &gt; BG (<math>p &lt; 0.001</math>)</li> <li>• BG &lt; FH (<math>p = 0.036</math>), BG &lt; NS (<math>p &lt; 0.001</math>),<br/>BG &lt; MT (<math>p = 0.009</math>)</li> </ul> | No ( $\chi^2(5) = 7.441, p = 0.190$ )                                                                                                                                                                                            |
| <b>FEAR</b>              | <b>Hits</b>                                                                                                                                                                                                                                                                                                                                                                                  | <b>Misses</b>                                                                                                                                                                                                                    |
| Most viewed AOIs         | EY (28.79%), FH (24.18%)                                                                                                                                                                                                                                                                                                                                                                     | EY (29.78%), FH (20.90%)<br>NS (19.31%)                                                                                                                                                                                          |
| Statistical significance | Yes ( $\chi^2(5) = 41.086, p < 0.001$ ) for<br><ul style="list-style-type: none"> <li>• EY &gt; CH (<math>p = 0.011</math>), EY &gt; MT (<math>p = 0.017</math>),<br/>EY &gt; BG (<math>p &lt; 0.001</math>)</li> <li>• BG &lt; FH (<math>p = 0.007</math>), BG &lt; NS (<math>p &lt; 0.001</math>)</li> </ul>                                                                               | Yes ( $\chi^2(5) = 42.298, p < 0.001$ ) for<br><ul style="list-style-type: none"> <li>• EY &gt; MT (<math>p = 0.031</math>), EY &gt; BG (<math>p &lt; 0.001</math>)</li> <li>• NS &gt; BG (<math>p &lt; 0.001</math>)</li> </ul> |
| <b>ANGER</b>             | <b>Hits</b>                                                                                                                                                                                                                                                                                                                                                                                  | <b>Misses</b>                                                                                                                                                                                                                    |
| Most viewed AOIs         | EY (27.50%)<br>FH (19.02%), NS (18.99%)                                                                                                                                                                                                                                                                                                                                                      | EY (40.14%)<br>NS (19.37%)                                                                                                                                                                                                       |
| Statistical significance | Yes ( $\chi^2(5) = 37.841, p < 0.001$ ) for<br><ul style="list-style-type: none"> <li>• EY &gt; FH (<math>p = 0.007</math>), EY &gt; CH (<math>p = 0.007</math>),<br/>EY &gt; BG (<math>p &lt; 0.001</math>)</li> <li>• NS &gt; BG (<math>p &lt; 0.001</math>)</li> </ul>                                                                                                                    | No ( $\chi^2(5) = 10.630, p = 0.059$ )                                                                                                                                                                                           |
| <b>DISGUST</b>           | <b>Hits</b>                                                                                                                                                                                                                                                                                                                                                                                  | <b>Misses</b>                                                                                                                                                                                                                    |
| Most viewed AOIs         | EY (27.87%)<br>NS (19.48%), MT (18.25%)                                                                                                                                                                                                                                                                                                                                                      | EY (28.56%), FH (26.03%), NS (20.22%)                                                                                                                                                                                            |
| Statistical significance | Yes ( $\chi^2(5) = 36.826, p < 0.001$ ) for<br><ul style="list-style-type: none"> <li>• EY &gt; FH (<math>p = 0.065</math>), EY &gt; CH (<math>p = 0.022</math>),<br/>EY &gt; MT (<math>p = 0.036</math>), EY &gt; BG (<math>p = 0.006</math>)</li> <li>• NS &gt; BG (<math>p &lt; 0.001</math>)</li> </ul>                                                                                  | Yes ( $\chi^2(5) = 23.354, p < 0.001$ ) for<br><ul style="list-style-type: none"> <li>• EY &gt; BG (<math>p = 0.017</math>)</li> <li>• NS &gt; BG (<math>p = 0.031</math>)</li> </ul>                                            |
| <b>JOY</b>               | <b>Hits</b>                                                                                                                                                                                                                                                                                                                                                                                  | <b>Misses</b>                                                                                                                                                                                                                    |
| Most viewed AOIs         | EY (24.15%), MT (23.13%), NS (21.71%)                                                                                                                                                                                                                                                                                                                                                        | EY (30.26%)<br>MT (19.09%), NS (18.86%), CH (18.42%)                                                                                                                                                                             |
| Statistical significance | Yes ( $\chi^2(5) = 47.560, p < 0.001$ ) for<br><ul style="list-style-type: none"> <li>• EY &gt; FH (<math>p = 0.001</math>), EY &gt; BG (<math>p &lt; 0.001</math>)</li> <li>• NS &gt; FH (<math>p = 0.001</math>), NS &gt; BG (<math>p &lt; 0.001</math>)</li> <li>• BG &lt; CH (<math>p = 0.028</math>), BG &lt; MT (<math>p = 0.006</math>)</li> </ul>                                    | No ( $\chi^2(5) = 10.541, p = 0.061$ )                                                                                                                                                                                           |
| <b>SADNESS</b>           | <b>Hits</b>                                                                                                                                                                                                                                                                                                                                                                                  | <b>Misses</b>                                                                                                                                                                                                                    |
| Most viewed AOIs         | EY (31.43%)<br>FH (17.70%), NS (17.16%)                                                                                                                                                                                                                                                                                                                                                      | EY (24.95%), MT (24.09%)<br>FH (19.72%), NS (18.14%)                                                                                                                                                                             |
| Statistical significance | Yes ( $\chi^2(5) = 40.909, p < 0.001$ ) for<br><ul style="list-style-type: none"> <li>• EY &gt; FH (<math>p = 0.028</math>), EY &gt; CH (<math>p &lt; 0.001</math>),<br/>EY &gt; MT (<math>p = 0.022</math>), EY &gt; BG (<math>p &lt; 0.001</math>)</li> <li>• NS &gt; BG (<math>p = 0.001</math>)</li> </ul>                                                                               | Yes ( $\chi^2(5) = 25.424, p = 0.001$ ) for<br><ul style="list-style-type: none"> <li>• EY &gt; BG (<math>p = 0.002</math>)</li> <li>• NS &gt; BG (<math>p = 0.006</math>)</li> </ul>                                            |

**Table A.2.** Summary of the viewing time results by emotion in middle-aged adults.

|                          |                                                                                                                                                                                                                                                              |                                                                                                                                                                          |
|--------------------------|--------------------------------------------------------------------------------------------------------------------------------------------------------------------------------------------------------------------------------------------------------------|--------------------------------------------------------------------------------------------------------------------------------------------------------------------------|
| <b>NEUTRAL</b>           | <b>Hits</b>                                                                                                                                                                                                                                                  | <b>Misses</b>                                                                                                                                                            |
| Most viewed AOIs         | EY (22.15%), FH (21.23%), MT (20.40%)<br>NS (17.47%)                                                                                                                                                                                                         | FH (33.33%), BG (30.44%), MT (23.76%)                                                                                                                                    |
| Statistical significance | Yes ( $\chi^2(5) = 27.304, p < 0.001$ ) for <ul style="list-style-type: none"> <li>• EY &gt; BG (<math>p &lt; 0.001</math>)</li> <li>• NS &gt; BG (<math>p = 0.003</math>)</li> </ul>                                                                        | No ( $\chi^2(5) = 2.660, p = 0.752$ )                                                                                                                                    |
| <b>SURPRISE</b>          | <b>Hits</b>                                                                                                                                                                                                                                                  | <b>Misses</b>                                                                                                                                                            |
| Most viewed AOIs         | EY (21.93%)<br>MT (19.76%), FH (19.10%)                                                                                                                                                                                                                      | FH (29.81%), EY (27.68%)<br>NS (17.31%)                                                                                                                                  |
| Statistical significance | Yes ( $\chi^2(5) = 15.092, p = 0.010$ ) for <ul style="list-style-type: none"> <li>• EY &gt; CH (<math>p = 0.022</math>), EY &gt; BG (<math>p = 0.015</math>)</li> </ul>                                                                                     | No ( $\chi^2(5) = 8.565, p = 0.128$ )                                                                                                                                    |
| <b>FEAR</b>              | <b>Hits</b>                                                                                                                                                                                                                                                  | <b>Misses</b>                                                                                                                                                            |
| Most viewed AOIs         | EY (24.30%), FH (24.01%)<br>MT (16.65%), BG (14.71%)                                                                                                                                                                                                         | EY (26.43%)<br>FH (19.01%)                                                                                                                                               |
| Statistical significance | Yes ( $\chi^2(5) = 24.490, p < 0.001$ ) for <ul style="list-style-type: none"> <li>• EY &gt; CH (<math>p &lt; 0.001</math>), EY &gt; BG (<math>p = 0.022</math>)</li> <li>• FH &gt; CH (<math>p = 0.036</math>)</li> </ul>                                   | Yes ( $\chi^2(5) = 17.658, p = 0.003$ ) for <ul style="list-style-type: none"> <li>• EY &gt; BG (<math>p = 0.003</math>)</li> </ul>                                      |
| <b>ANGER</b>             | <b>Hits</b>                                                                                                                                                                                                                                                  | <b>Misses</b>                                                                                                                                                            |
| Most viewed AOIs         | EY (24.10%)<br>FH (20.58%), MT (18.58%)                                                                                                                                                                                                                      | FH (22.92%), EY (21.56%), MT (20.80%)<br>NS (14.03%)                                                                                                                     |
| Statistical significance | Yes ( $\chi^2(5) = 22.685, p < 0.001$ ) for <ul style="list-style-type: none"> <li>• EY &gt; CH (<math>p = 0.025</math>), EY &gt; BG (<math>p &lt; 0.001</math>)</li> </ul>                                                                                  | Yes ( $\chi^2(5) = 14.465, p = 0.013$ ) for <ul style="list-style-type: none"> <li>• The pairwise comparison did not find differences among the AOIs.</li> </ul>         |
| <b>DISGUST</b>           | <b>Hits</b>                                                                                                                                                                                                                                                  | <b>Misses</b>                                                                                                                                                            |
| Most viewed AOIs         | EY (24.27%)<br>NS (17.17%), MT (16.79%), FH (16.65%)                                                                                                                                                                                                         | EY (26.40%)<br>FH (19.35%)                                                                                                                                               |
| Statistical significance | Yes ( $\chi^2(5) = 14.774, p = 0.011$ ) for <ul style="list-style-type: none"> <li>• EY &gt; BG (<math>p = 0.006</math>)</li> </ul>                                                                                                                          | Yes ( $\chi^2(5) = 20.313, p < 0.001$ ) for <ul style="list-style-type: none"> <li>• EY &gt; CH (<math>p = 0.009</math>), EY &gt; BG (<math>p = 0.005</math>)</li> </ul> |
| <b>JOY</b>               | <b>Hits</b>                                                                                                                                                                                                                                                  | <b>Misses</b>                                                                                                                                                            |
| Most viewed AOIs         | MT (24.29%)<br>EY (19.89%), NS (18.36%)                                                                                                                                                                                                                      | BG (41.14%), MT (28.01%)                                                                                                                                                 |
| Statistical significance | Yes ( $\chi^2(5) = 21.753, p < 0.001$ ) for <ul style="list-style-type: none"> <li>• EY &gt; BG (<math>p = 0.009</math>)</li> <li>• BG &lt; NS (<math>p = 0.012</math>), BG &lt; MT (<math>p = 0.032</math>)</li> </ul>                                      | Yes ( $\chi^2(5) = 21.086, p < 0.001$ ) <ul style="list-style-type: none"> <li>• The pairwise comparison did not find differences among the AOIs.</li> </ul>             |
| <b>SADNESS</b>           | <b>Hits</b>                                                                                                                                                                                                                                                  | <b>Misses</b>                                                                                                                                                            |
| Most viewed AOIs         | EY (24.37%)<br>FH (19.82%)                                                                                                                                                                                                                                   | MT (26.43%), EY (20.95%)<br>FH (19.51%)                                                                                                                                  |
| Statistical significance | Yes ( $\chi^2(5) = 25.466, p < 0.001$ ) for <ul style="list-style-type: none"> <li>• EY &gt; CH (<math>p = 0.017</math>), EY &gt; BG (<math>p = 0.002</math>)</li> <li>• NS &gt; CH (<math>p = 0.046</math>), NS &gt; BG (<math>p = 0.005</math>)</li> </ul> | No ( $\chi^2(5) = 8.243, p = 0.143$ )                                                                                                                                    |

**Table A.3.** Summary of the viewing time results by emotion in older adults.

| <b>NEUTRAL</b>           | <b>Hits</b>                                                                                                       | <b>Misses</b>                                                                                                     |
|--------------------------|-------------------------------------------------------------------------------------------------------------------|-------------------------------------------------------------------------------------------------------------------|
| Most viewed AOIs         | EY (27.55%), FH (20.71%), BG (20.17%)                                                                             | EY (43.83%), MT (21.75%)                                                                                          |
| Statistical significance | Yes ( $\chi^2(5) = 16.943, p = 0.005$ ) for<br>• EY > CH ( $p = 0.009$ ), EY > BG ( $p = 0.035$ )                 | No ( $\chi^2(5) = 5.036, p = 0.412$ )                                                                             |
| <b>SURPRISE</b>          | <b>Hits</b>                                                                                                       | <b>Misses</b>                                                                                                     |
| Most viewed AOIs         | EY (25.27%), BG (22.04%)<br>FH (19.61%)                                                                           | BG (30.82%), EY (26.59%)                                                                                          |
| Statistical significance | Yes ( $\chi^2(5) = 14.102, p = 0.015$ ) for<br>• EY > CH ( $p = 0.005$ )                                          | No ( $\chi^2(5) = 5.911, p = 0.315$ )                                                                             |
| <b>FEAR</b>              | <b>Hits</b>                                                                                                       | <b>Misses</b>                                                                                                     |
| Most viewed AOIs         | EY (25.44%), FH (21.13%)<br>BG (19.21%)                                                                           | BG (27.29%), EY (22.42%)                                                                                          |
| Statistical significance | Yes ( $\chi^2(5) = 14.345, p = 0.014$ ) for<br>• EY > CH ( $p = 0.023$ )                                          | No ( $\chi^2(5) = 10.127, p = 0.072$ )                                                                            |
| <b>ANGER</b>             | <b>Hits</b>                                                                                                       | <b>Misses</b>                                                                                                     |
| Most viewed AOIs         | EY (24.54%), BG (23.73%)<br>FH (18.64%)                                                                           | EY (25.90%), BG (24.58%)<br>NS (19.02%)                                                                           |
| Statistical significance | No ( $\chi^2(5) = 9.832, p = 0.080$ )                                                                             | No ( $\chi^2(5) = 9.135, p = 0.104$ )                                                                             |
| <b>DISGUST</b>           | <b>Hits</b>                                                                                                       | <b>Misses</b>                                                                                                     |
| Most viewed AOIs         | EY (23.04%), BG (22.39%)<br>FH (18.75%), NS (16.35%)                                                              | BG (25.80%), FH (25.58%), EY (21.45%)                                                                             |
| Statistical significance | Yes ( $\chi^2(5) = 16.199, p = 0.006$ ) for<br>• EY > CH ( $p = 0.011$ ), EY > MT ( $p = 0.017$ )                 | No ( $\chi^2(5) = 5.342, p = 0.376$ )                                                                             |
| <b>JOY</b>               | <b>Hits</b>                                                                                                       | <b>Misses</b>                                                                                                     |
| Most viewed AOIs         | EY (24.12%), BG (21.72%)<br>NS (17.20%), MT (17.08%)                                                              | BG (27.35%), FH (23.10%)<br>EY (19.69%), MT (19.60%)                                                              |
| Statistical significance | Yes ( $\chi^2(5) = 15.635, p = 0.008$ ) for<br>• EY > CH ( $p = 0.007$ )                                          | No ( $\chi^2(5) = 7.258, p = 0.202$ )                                                                             |
| <b>SADNESS</b>           | <b>Hits</b>                                                                                                       | <b>Misses</b>                                                                                                     |
| Most viewed AOIs         | BG (22.05%), EY (21.77%)<br>FH (19.64%)                                                                           | EY (28.56%), BG (25.90%)                                                                                          |
| Statistical significance | Yes ( $\chi^2(5) = 11.422, p = 0.044$ ) for<br>• The pairwise comparison did not find differences among the AOIs. | Yes ( $\chi^2(5) = 12.626, p = 0.027$ ) for<br>• The pairwise comparison did not find differences among the AOIs. |
