# Supplementary material for: An exploratory study of the effect of age and gender on face scanning during affect recognition in immersive virtual reality
Source: PubMed Central journal article supplement (PMC10918108; doi:10.1038/s41598-024-55774-3), 2024-03-06
Supplement: 41598_2024_55774_MOESM2_ESM.pdf [file 41598_2024_55774_MOESM2_ESM.pdf]

# Effect of age and gender on face scanning during affect recognition in immersive virtual reality

## Supplementary Material B. Summaries of viewing time results by emotion and gender

**Table B.1.** Summary of the viewing time results by emotion in men.

| <b>NEUTRAL</b>           | <b>Hits</b>                                                                                                                                                                                                                                                                                                                                                                                                                     | <b>Misses</b>                                                                                                                                                                |
|--------------------------|---------------------------------------------------------------------------------------------------------------------------------------------------------------------------------------------------------------------------------------------------------------------------------------------------------------------------------------------------------------------------------------------------------------------------------|------------------------------------------------------------------------------------------------------------------------------------------------------------------------------|
| Most viewed AOIs         | EY (27.99%)<br>NS (19.26%)                                                                                                                                                                                                                                                                                                                                                                                                      | EY (25.24%), FH (24.14%)<br>BG (19.36%), MT (18.44%)                                                                                                                         |
| Statistical significance | Yes ( $\chi^2(5) = 45.371, p < 0.001$ ) for<br><ul style="list-style-type: none"> <li>EY &gt; FH (<math>p = 0.003</math>), EY &gt; CH (<math>p = 0.002</math>),<br/>EY &gt; MT (<math>p = 0.004</math>), EY &gt; BG (<math>p &lt; 0.001</math>)</li> </ul>                                                                                                                                                                      | No ( $\chi^2(5) = 4.512, p = 0.478$ )                                                                                                                                        |
| <b>SURPRISE</b>          | <b>Hits</b>                                                                                                                                                                                                                                                                                                                                                                                                                     | <b>Misses</b>                                                                                                                                                                |
| Most viewed AOIs         | EY (29.11%)<br>FH (16.56%), MT (15.96%), NS (15.90%)                                                                                                                                                                                                                                                                                                                                                                            | EY (27.33%)<br>FH (19.24%), BG (18.42%)                                                                                                                                      |
| Statistical significance | Yes ( $\chi^2(5) = 40.351, p < 0.001$ ) for<br><ul style="list-style-type: none"> <li>EY &gt; FH (<math>p = 0.004</math>), EY &gt; CH (<math>p &lt; 0.001</math>),<br/>EY &gt; MT (<math>p = 0.001</math>), EY &gt; BG (<math>p &lt; 0.001</math>)<br/>• NS &gt; BG (<math>p = 0.009</math>)</li> </ul>                                                                                                                         | No ( $\chi^2(5) = 4.382, p = 0.496$ )                                                                                                                                        |
| <b>FEAR</b>              | <b>Hits</b>                                                                                                                                                                                                                                                                                                                                                                                                                     | <b>Misses</b>                                                                                                                                                                |
| Most viewed AOIs         | EY (28.94%), FH (20.44%)                                                                                                                                                                                                                                                                                                                                                                                                        | EY (28.15%)<br>MT (17.48%), NS (16.88%)                                                                                                                                      |
| Statistical significance | Yes ( $\chi^2(5) = 38.370, p < 0.001$ ) for<br><ul style="list-style-type: none"> <li>EY &gt; FH (<math>p = 0.049</math>), EY &gt; CH (<math>p &lt; 0.001</math>),<br/>EY &gt; BG (<math>p &lt; 0.001</math>)<br/>• NS &gt; CH (<math>p = 0.019</math>), BG (<math>p = 0.036</math>)</li> </ul>                                                                                                                                 | Yes ( $\chi^2(5) = 33.907, p < 0.001$ ) for<br><ul style="list-style-type: none"> <li>EY &gt; FH (<math>p &lt; 0.001</math>), EY &gt; CH (<math>p = 0.044</math>)</li> </ul> |
| <b>ANGER</b>             | <b>Hits</b>                                                                                                                                                                                                                                                                                                                                                                                                                     | <b>Misses</b>                                                                                                                                                                |
| Most viewed AOIs         | EY (28.60%)<br>NS (17.43%), MT (16.33%)                                                                                                                                                                                                                                                                                                                                                                                         | EY (34.22%)<br>BG (18.42%)                                                                                                                                                   |
| Statistical significance | Yes ( $\chi^2(5) = 40.748, p < 0.001$ ) for<br><ul style="list-style-type: none"> <li>EY &gt; FH (<math>p = 0.002</math>), EY &gt; CH (<math>p = 0.001</math>),<br/>EY &gt; MT (<math>p = 0.0264</math>), EY &gt; BG (<math>p &lt; 0.001</math>)<br/>• NS &gt; BG (<math>p = 0.001</math>)</li> </ul>                                                                                                                           | Yes ( $\chi^2(5) = 21.153, p < 0.001$ ) for<br><ul style="list-style-type: none"> <li>EY &gt; CH (<math>p = 0.040</math>), EY &gt; BG (<math>p = 0.049</math>)</li> </ul>    |
| <b>DISGUST</b>           | <b>Hits</b>                                                                                                                                                                                                                                                                                                                                                                                                                     | <b>Misses</b>                                                                                                                                                                |
| Most viewed AOIs         | EY (28.42%)<br>NS (18.42%)                                                                                                                                                                                                                                                                                                                                                                                                      | EY (26.35%), FH (20.72%)<br>NS (17.27%)                                                                                                                                      |
| Statistical significance | Yes ( $\chi^2(5) = 40.342, p < 0.001$ ) for<br><ul style="list-style-type: none"> <li>EY &gt; FH (<math>p &lt; 0.001</math>), EY &gt; CH (<math>p = 0.012</math>),<br/>EY &gt; MT (<math>p &lt; 0.001</math>), EY &gt; BG (<math>p &lt; 0.001</math>)<br/>• NS &gt; BG (<math>p = 0.002</math>)</li> </ul>                                                                                                                      | Yes ( $\chi^2(5) = 22.363, p < 0.001$ ) for<br><ul style="list-style-type: none"> <li>EY &gt; CH (<math>p = 0.006</math>), EY &gt; BG (<math>p = 0.024</math>)</li> </ul>    |
| <b>JOY</b>               | <b>Hits</b>                                                                                                                                                                                                                                                                                                                                                                                                                     | <b>Misses</b>                                                                                                                                                                |
| Most viewed AOIs         | EY (23.27%), NS (20.79%), MT (20.79%)                                                                                                                                                                                                                                                                                                                                                                                           | BG (33.07%), MT (22.49%)<br>EY (19.36%)                                                                                                                                      |
| Statistical significance | Yes ( $\chi^2(5) = 45.627, p < 0.001$ ) for<br><ul style="list-style-type: none"> <li>EY &gt; FH (<math>p = 0.001</math>), EY &gt; CH (<math>p = 0.010</math>),<br/>EY &gt; MT (<math>p = 0.014</math>), EY &gt; BG (<math>p &lt; 0.001</math>)<br/>• NS &gt; FH (<math>p = 0.002</math>), NS &gt; CH (<math>p = 0.026</math>),<br/>NS &gt; BG (<math>p &lt; 0.001</math>)<br/>• MT &gt; BG (<math>p = 0.006</math>)</li> </ul> | Yes ( $\chi^2(5) = 11.269, p = 0.046$ ) for<br><ul style="list-style-type: none"> <li>The pairwise comparison did not find differences among the AOIs.</li> </ul>            |
| <b>SADNESS</b>           | <b>Hits</b>                                                                                                                                                                                                                                                                                                                                                                                                                     | <b>Misses</b>                                                                                                                                                                |
| Most viewed AOIs         | EY (27.02%)<br>NS (17.61%), FH (16.64%), MT (16.37%)                                                                                                                                                                                                                                                                                                                                                                            | EY (27.50%)<br>MT (19.01%)                                                                                                                                                   |
| Statistical significance | Yes ( $\chi^2(5) = 42.682, p < 0.001$ ) for<br><ul style="list-style-type: none"> <li>EY &gt; CH (<math>p &lt; 0.001</math>), EY &gt; BG (<math>p &lt; 0.001</math>)<br/>• BG &lt; NS (<math>p &lt; 0.001</math>), BG &lt; FH (<math>p = 0.049</math>),<br/>BG &lt; MT (<math>p = 0.021</math>)</li> </ul>                                                                                                                      | Yes ( $\chi^2(5) = 18.648, p = 0.002$ ) for<br><ul style="list-style-type: none"> <li>EY &gt; BG (<math>p = 0.014</math>)</li> </ul>                                         |

**Table B.2.** Summary of the viewing time results by emotion in women.

| <b>NEUTRAL</b>           | <b>Hits</b>                                                                                                                                                                         | <b>Misses</b>                                                                                                                                              |
|--------------------------|-------------------------------------------------------------------------------------------------------------------------------------------------------------------------------------|------------------------------------------------------------------------------------------------------------------------------------------------------------|
| Most viewed AOIs         | EY (25.24%), FH (24.15%)<br>MT (18.44%)                                                                                                                                             | MT (31.72%), FH (25.00%)<br>EY (19.97%)                                                                                                                    |
| Statistical significance | Yes ( $\chi^2(5) = 38.713, p < 0.001$ ) for<br>• EY > CH ( $p < 0.001$ ), EY > BG ( $p < 0.001$ )                                                                                   | No ( $\chi^2(5) = 4.815, p = 0.439$ )                                                                                                                      |
| <b>SURPRISE</b>          | <b>Hits</b>                                                                                                                                                                         | <b>Misses</b>                                                                                                                                              |
| Most viewed AOIs         | EY (23.40%), FH (22.06%)<br>MT (18.62%)                                                                                                                                             | EY (28.61%), FH (27.02%)<br>NS (13.62%), MT (12.88%), BG (12.73%)                                                                                          |
| Statistical significance | Yes ( $\chi^2(5) = 26.758, p < 0.001$ ) for<br>• EY > CH ( $p < 0.001$ ), EY > BG ( $p < 0.001$ )                                                                                   | Yes ( $\chi^2(5) = 11.789, p = 0.038$ ) for<br>• The pairwise comparison did not find differences among the AOIs.                                          |
| <b>FEAR</b>              | <b>Hits</b>                                                                                                                                                                         | <b>Misses</b>                                                                                                                                              |
| Most viewed AOIs         | FH (26.30%), EY (24.74%)<br>MT (16.53%)                                                                                                                                             | EY (28.15%)<br>NS (15.31%), MT (14.23%)                                                                                                                    |
| Statistical significance | Yes ( $\chi^2(5) = 30.395, p < 0.001$ ) for<br>• EY > CH ( $p = 0.001$ ), EY > BG ( $p < 0.001$ )<br>• NS > BG ( $p = 0.014$ )                                                      | Yes ( $\chi^2(5) = 31.029, p < 0.001$ ) for<br>• EY > CH ( $p = 0.004$ ), EY > MT ( $p = 0.018$ ),<br>EY > BG ( $p < 0.001$ )<br>• NS > BG ( $p = 0.025$ ) |
| <b>ANGER</b>             | <b>Hits</b>                                                                                                                                                                         | <b>Misses</b>                                                                                                                                              |
| Most viewed AOIs         | FH (24.09%), EY (22.04%)<br>MT (16.37%)                                                                                                                                             | MT (21.95%), EY (20.12%)<br>NS (19.24%)                                                                                                                    |
| Statistical significance | Yes ( $\chi^2(5) = 23.9718, p < 0.001$ ) for<br>• EY > CH ( $p = 0.002$ ), EY > BG ( $p < 0.001$ )                                                                                  | Yes ( $\chi^2(5) = 12.503, p = 0.029$ ) for<br>• The pairwise comparison did not find differences among the AOIs.                                          |
| <b>DISGUST</b>           | <b>Hits</b>                                                                                                                                                                         | <b>Misses</b>                                                                                                                                              |
| Most viewed AOIs         | EY (21.78%), FH (20.91%)<br>MT (17.93%), NS (17.09%)                                                                                                                                | EY (25.55%), FH (25.38%)<br>NS (16.06%), MT (15.24%)                                                                                                       |
| Statistical significance | Yes ( $\chi^2(5) = 22.266, p < 0.001$ ) for<br>• EY > CH ( $p = 0.002$ ), EY > BG ( $p = 0.006$ )                                                                                   | Yes ( $\chi^2(5) = 20.726, p < 0.001$ ) for<br>• EY > CH ( $p = 0.037$ ), EY > BG ( $p = 0.011$ )                                                          |
| <b>JOY</b>               | <b>Hits</b>                                                                                                                                                                         | <b>Misses</b>                                                                                                                                              |
| Most viewed AOIs         | MT (23.14%), EY (21.75%)<br>NS (17.57%)                                                                                                                                             | MT (23.94%), FH (21.53%), BG (20.40%)                                                                                                                      |
| Statistical significance | Yes ( $\chi^2(5) = 27.424, p < 0.001$ ) for<br>• EY > FH ( $p = 0.006$ ), EY > CH ( $p = 0.020$ ),<br>EY > BG ( $p < 0.001$ )<br>• BG < NS ( $p = 0.037$ ), BG < MT ( $p = 0.046$ ) | No ( $\chi^2(5) = 2.573, p = 0.766$ )                                                                                                                      |
| <b>SADNESS</b>           | <b>Hits</b>                                                                                                                                                                         | <b>Misses</b>                                                                                                                                              |
| Most viewed AOIs         | EY (25.30%), FH (21.39%)                                                                                                                                                            | MT (23.64%), FH (21.46%), EY (21.68%)                                                                                                                      |
| Statistical significance | Yes ( $\chi^2(5) = 27.253, p < 0.001$ ) for<br>• EY > CH ( $p < 0.001$ ), EY > BG ( $p < 0.001$ )                                                                                   | Yes ( $\chi^2(5) = 19.981, p = 0.001$ ) for<br>• EY > CH ( $p = 0.046$ ), EY > BG ( $p = 0.009$ )                                                          |
